# Supplementary material for: Differences of East Asian Summer Monsoon Precipitation Responses between Transient and Stabilization Simulations
Source: MDPI journal article supplement (doi:10.3390/atmos14121763), 2023-11-29
Supplement: s1 [file s1]

# Supplementary Materials: Differences of East Asian Summer Monsoon Precipitation Responses between Transient and Stabilization Simulations

Jiawei Liu <sup>1</sup>, Haiming Xu <sup>2,\*</sup>, Jiechun Deng <sup>2</sup>, Jing Ma <sup>2</sup> and Leying Zhang <sup>3</sup>

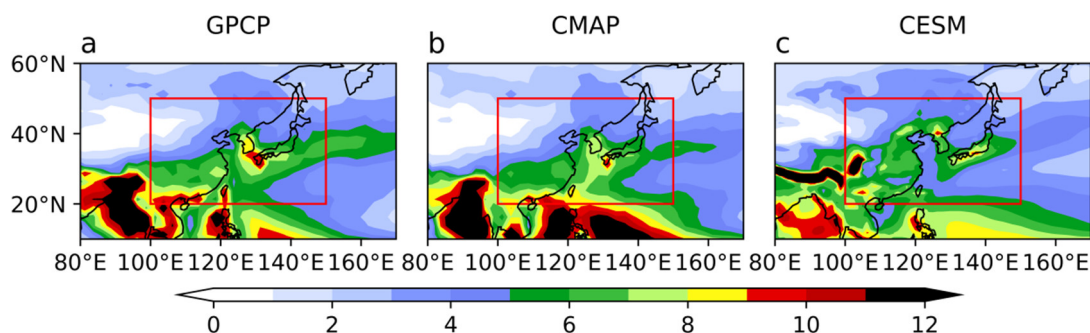

**Figure S1.** The summer precipitation climatology in East Asia during historical period (1979-2005). a uses the GPCP data, b uses the CMAP data, c is simulated by the CESM. The red rectangle denotes the EASM region (100°-150°E, 20°-50°N).

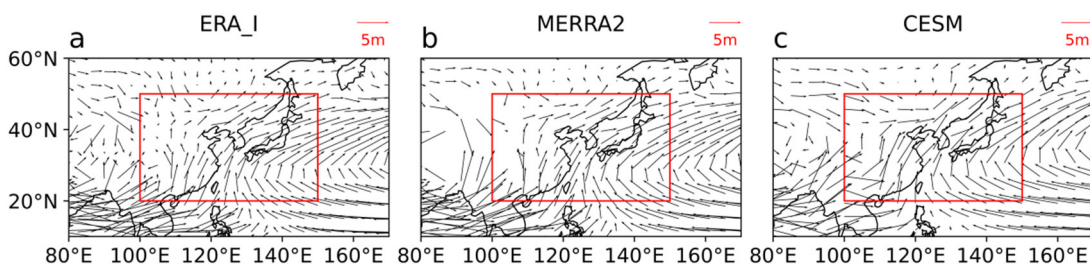

**Figure S2.** The summer 850-hPa wind climatology in East Asia during historical period (1979-2005). a uses the ERA-Interim reanalysis data, b uses the MERRA-2 reanalysis data, c is simulated by the CESM. The red rectangle denotes the EASM region (100°-150°E, 20°-50°N).
